# Supplementary material for: CHEMDNER: The drugs and chemical names extraction challenge
Source: PubMed Central journal article supplement (PMC4331685; doi:10.1186/1758-2946-7-s1-s1), 2015-01-19
Supplement: 1758-2946-7-S1-S1-S1.pdf [file 1758-2946-7-S1-S1-S1.pdf]

Additional file 1: CDI evaluation results for all teams and runs

| Team | Run | Predictions | $P$    | $R$    | $F_1$  |
|------|-----|-------------|--------|--------|--------|
| 173  | 1   | 13382       | 88.036 | 86.056 | 87.035 |
| 173  | 2   | 13601       | 87.810 | 87.239 | 87.523 |
| 173  | 3   | 15215       | 82.675 | 91.885 | 87.037 |
| 173  | 4   | 13946       | 86.627 | 88.247 | 87.429 |
| 173  | 5   | 16552       | 76.293 | 92.243 | 83.513 |
| 177  | 1   | 16223       | 59.446 | 70.446 | 64.480 |
| 177  | 2   | 15473       | 62.108 | 70.197 | 65.905 |
| 179  | 1   | 12619       | 87.963 | 81.081 | 84.382 |
| 179  | 2   | 13265       | 87.584 | 84.865 | 86.203 |
| 179  | 3   | 12111       | 89.877 | 79.511 | 84.377 |
| 179  | 4   | 12790       | 89.163 | 83.302 | 86.133 |
| 179  | 5   | 13170       | 87.585 | 84.259 | 85.890 |
| 182  | 1   | 13020       | 60.307 | 57.356 | 58.794 |
| 182  | 2   | 64933       | 16.092 | 76.326 | 26.580 |
| 182  | 3   | 5092        | 92.321 | 34.339 | 50.059 |
| 182  | 4   | 2310        | 98.658 | 16.647 | 28.487 |
| 184  | 1   | 12977       | 90.383 | 85.676 | 87.966 |
| 184  | 2   | 12941       | 90.395 | 85.449 | 87.853 |
| 184  | 3   | 12784       | 91.278 | 85.237 | 88.154 |
| 184  | 4   | 12747       | 91.292 | 85.004 | 88.036 |
| 184  | 5   | 13360       | 88.518 | 86.384 | 87.438 |
| 185  | 1   | 13803       | 82.417 | 83.097 | 82.756 |
| 185  | 2   | 13807       | 82.400 | 83.104 | 82.751 |
| 185  | 3   | 13759       | 82.775 | 83.192 | 82.983 |
| 191  | 1   | 10375       | 74.361 | 56.355 | 64.118 |
| 191  | 2   | 9850        | 80.995 | 58.276 | 67.782 |
| 191  | 3   | 10428       | 76.592 | 58.342 | 66.233 |
| 196  | 1   | 0           | 0.000  | 0.000  | 0.000  |
| 196  | 2   | 1139        | 96.839 | 8.057  | 14.876 |
| 196  | 3   | 19346       | 57.655 | 81.476 | 67.526 |
| 196  | 4   | 3636        | 91.887 | 24.405 | 38.566 |
| 196  | 5   | 4838        | 77.139 | 27.261 | 40.285 |
| 197  | 1   | 13060       | 86.348 | 82.374 | 84.314 |
| 197  | 2   | 13456       | 83.851 | 82.418 | 83.128 |
| 197  | 3   | 12680       | 87.287 | 80.847 | 83.944 |
| 197  | 4   | 13120       | 84.619 | 81.096 | 82.820 |
| 197  | 5   | 12709       | 87.473 | 81.205 | 84.223 |
| 198  | 1   | 7961        | 85.127 | 49.503 | 62.602 |
| 198  | 2   | 13275       | 88.444 | 85.763 | 87.083 |
| 198  | 3   | 12988       | 88.251 | 83.725 | 85.928 |
| 198  | 4   | 13256       | 89.341 | 86.508 | 87.902 |
| 198  | 5   | 13188       | 89.134 | 85.866 | 87.469 |
| 199  | 1   | 11522       | 84.907 | 71.461 | 77.606 |
| 207  | 1   | 10344       | 77.369 | 58.459 | 66.597 |
| 207  | 2   | 11975       | 81.244 | 71.066 | 75.815 |
| 214  | 1   | 10267       | 86.199 | 64.646 | 73.882 |
| 214  | 2   | 10896       | 86.399 | 68.766 | 76.580 |
| 214  | 3   | 10422       | 88.582 | 67.436 | 76.576 |
| 214  | 4   | 12043       | 80.686 | 70.979 | 75.522 |
| 214  | 5   | 11568       | 82.694 | 69.876 | 75.746 |
| 217  | 1   | 13737       | 74.893 | 75.150 | 75.021 |
| 217  | 2   | 14400       | 73.444 | 77.253 | 75.301 |
| 217  | 3   | 14006       | 73.554 | 75.252 | 74.393 |
| 217  | 4   | 14667       | 72.155 | 77.305 | 74.641 |
| 217  | 5   | 13816       | 71.909 | 72.571 | 72.239 |
| 219  | 1   | 11444       | 79.107 | 66.129 | 72.038 |
| 219  | 2   | 40439       | 28.532 | 84.280 | 42.631 |
| 219  | 3   | 14589       | 66.975 | 71.373 | 69.104 |
| 219  | 4   | 5555        | 90.837 | 36.859 | 52.440 |
| 219  | 5   | 15880       | 63.054 | 73.141 | 67.724 |
| 222  | 1   | 12186       | 81.011 | 72.111 | 76.302 |
| 222  | 2   | 15578       | 66.074 | 75.186 | 70.336 |
| 222  | 3   | 12293       | 80.477 | 72.264 | 76.150 |
| 222  | 4   | 15830       | 65.193 | 75.383 | 69.919 |
| 222  | 5   | 11601       | 84.553 | 71.651 | 77.569 |

Continued on next page

Additional file 1 – continued from previous page

| Team | Run | Predictions | <i>P</i> | <i>R</i> | <i>F</i> <sub>1</sub> |
|------|-----|-------------|----------|----------|-----------------------|
| 225  | 1   | 11953       | 60.805   | 53.090   | 56.686                |
| 225  | 2   | 13349       | 56.948   | 55.530   | 56.230                |
| 225  | 3   | 23820       | 35.932   | 62.520   | 45.636                |
| 225  | 4   | 13973       | 53.603   | 54.711   | 54.152                |
| 225  | 5   | 22782       | 37.139   | 61.804   | 46.397                |
| 231  | 1   | 13051       | 89.411   | 85.237   | 87.274                |
| 231  | 2   | 14293       | 85.685   | 89.459   | 87.532                |
| 231  | 3   | 14066       | 87.018   | 89.408   | 88.197                |
| 231  | 4   | 12154       | 88.366   | 78.451   | 83.114                |
| 231  | 5   | 14582       | 84.453   | 89.956   | 87.118                |
| 233  | 1   | 13867       | 84.250   | 85.340   | 84.792                |
| 233  | 2   | 13495       | 83.134   | 81.950   | 82.538                |
| 233  | 3   | 13671       | 85.605   | 85.486   | 85.545                |
| 233  | 4   | 13522       | 83.153   | 82.133   | 82.640                |
| 233  | 5   | 13597       | 86.034   | 85.449   | 85.740                |
| 238  | 1   | 15737       | 56.898   | 65.405   | 60.856                |
| 238  | 2   | 25204       | 37.407   | 68.868   | 48.480                |
| 238  | 3   | 11627       | 76.486   | 64.960   | 70.253                |
| 238  | 4   | 17577       | 54.549   | 70.037   | 61.330                |
| 238  | 5   | 19968       | 47.907   | 69.876   | 56.842                |
| 245  | 1   | 12381       | 83.354   | 75.383   | 79.168                |
| 245  | 2   | 12783       | 81.147   | 75.771   | 78.367                |
| 245  | 3   | 13172       | 80.474   | 77.429   | 78.922                |
| 265  | 1   | 10122       | 83.393   | 61.658   | 70.897                |
| 265  | 2   | 10187       | 83.852   | 62.396   | 71.550                |
| 267  | 1   | 14294       | 72.653   | 75.858   | 74.221                |
