# Supplementary material for: CHEMDNER: The drugs and chemical names extraction challenge
Source: PubMed Central journal article supplement (PMC4331685; doi:10.1186/1758-2946-7-s1-s1), 2015-01-19
Supplement: 1758-2946-7-S1-S1-S3.pdf [file 1758-2946-7-S1-S1-S3.pdf]

Additional file 3: CEM recall per team, run, and, class

| Team | Run | Abbrev. | Family | Formula | Ident. | Multip. | System. | Trivial | Undef. | Novel |
|------|-----|---------|--------|---------|--------|---------|---------|---------|--------|-------|
| 173  | 1   | 87.68   | 82.16  | 81.99   | 83.23  | 39.70   | 91.37   | 90.14   | 70.73  | 74.69 |
| 173  | 2   | 82.85   | 78.71  | 83.94   | 86.16  | 48.24   | 91.97   | 87.83   | 68.29  | 73.90 |
| 173  | 3   | 91.33   | 87.99  | 89.37   | 90.06  | 53.27   | 95.89   | 94.03   | 78.05  | 83.49 |
| 173  | 4   | 88.37   | 84.40  | 83.18   | 89.86  | 40.20   | 92.76   | 92.74   | 78.05  | 78.51 |
| 173  | 5   | 91.38   | 90.06  | 88.09   | 87.52  | 60.30   | 95.25   | 94.15   | 75.61  | 82.43 |
| 177  | 1   | 48.39   | 63.72  | 48.65   | 57.89  | 3.52    | 76.97   | 84.90   | 17.07  | 54.32 |
| 177  | 2   | 47.65   | 63.97  | 47.28   | 57.89  | 3.52    | 77.16   | 84.99   | 17.07  | 53.92 |
| 179  | 1   | 75.76   | 75.51  | 63.81   | 66.86  | 27.64   | 88.97   | 91.42   | 56.10  | 70.93 |
| 179  | 2   | 82.06   | 84.15  | 70.52   | 70.37  | 27.64   | 90.24   | 92.24   | 60.98  | 71.93 |
| 179  | 3   | 73.27   | 72.42  | 63.29   | 66.47  | 27.64   | 87.88   | 90.29   | 56.10  | 68.29 |
| 179  | 4   | 79.70   | 81.06  | 70.03   | 69.98  | 27.64   | 89.14   | 91.07   | 60.98  | 69.34 |
| 179  | 5   | 80.39   | 81.20  | 72.00   | 69.00  | 28.14   | 89.87   | 91.96   | 60.98  | 71.69 |
| 182  | 1   | 39.00   | 63.31  | 20.07   | 28.65  | 0.50    | 68.11   | 86.03   | 7.32   | 43.28 |
| 182  | 2   | 79.58   | 86.28  | 50.54   | 67.45  | 4.52    | 85.51   | 94.25   | 60.98  | 73.04 |
| 182  | 3   | 9.34    | 29.57  | 3.51    | 8.19   | 0.00    | 44.12   | 65.87   | 0.00   | 19.31 |
| 182  | 4   | 0.71    | 8.01   | 0.14    | 0.00   | 0.00    | 20.14   | 39.34   | 0.00   | 6.80  |
| 184  | 1   | 64.89   | 82.19  | 71.48   | 72.71  | 41.71   | 90.63   | 89.83   | 53.66  | 66.26 |
| 184  | 2   | 62.60   | 82.19  | 71.48   | 72.71  | 41.71   | 90.40   | 89.83   | 53.66  | 65.05 |
| 184  | 3   | 64.72   | 81.22  | 71.51   | 72.71  | 41.71   | 90.26   | 89.28   | 53.66  | 65.64 |
| 184  | 4   | 62.40   | 81.22  | 71.51   | 72.71  | 41.71   | 90.03   | 89.28   | 53.66  | 64.43 |
| 184  | 5   | 66.05   | 84.15  | 71.42   | 72.71  | 43.22   | 90.94   | 90.53   | 53.66  | 67.72 |
| 185  | 1   | 70.39   | 82.14  | 66.39   | 68.03  | 31.16   | 86.27   | 87.72   | 68.29  | 71.65 |
| 185  | 2   | 70.29   | 82.14  | 66.51   | 68.03  | 30.65   | 86.27   | 87.72   | 68.29  | 71.60 |
| 185  | 3   | 70.39   | 82.25  | 66.39   | 68.03  | 31.16   | 86.32   | 87.86   | 68.29  | 71.66 |
| 191  | 1   | 49.72   | 48.87  | 43.22   | 49.90  | 1.00    | 58.42   | 65.29   | 24.39  | 22.43 |
| 192  | 1   | 65.16   | 79.38  | 75.08   | 60.82  | 40.70   | 87.79   | 88.90   | 51.22  | 56.79 |
| 192  | 2   | 64.99   | 79.24  | 75.02   | 60.62  | 38.19   | 87.12   | 88.41   | 51.22  | 56.05 |
| 192  | 3   | 65.53   | 79.29  | 75.08   | 64.91  | 38.69   | 87.80   | 90.03   | 51.22  | 57.87 |
| 192  | 4   | 65.29   | 79.27  | 75.17   | 64.72  | 39.70   | 87.79   | 90.16   | 51.22  | 57.83 |
| 192  | 5   | 66.22   | 81.34  | 73.80   | 65.89  | 28.64   | 88.79   | 91.30   | 58.54  | 59.05 |
| 196  | 1   | 0.00    | 0.00   | 0.00    | 0.00   | 0.00    | 0.00    | 0.00    | 0.00   | 0.00  |
| 196  | 2   | 3.25    | 7.26   | 4.65    | 0.00   | 0.50    | 5.12    | 12.26   | 0.00   | 2.20  |
| 196  | 3   | 57.21   | 85.81  | 59.98   | 49.32  | 42.21   | 86.32   | 89.66   | 46.34  | 57.00 |
| 196  | 4   | 14.41   | 29.82  | 17.95   | 1.17   | 10.05   | 24.09   | 26.52   | 0.00   | 8.25  |
| 196  | 5   | 15.50   | 33.74  | 18.36   | 1.17   | 10.55   | 27.29   | 29.29   | 2.44   | 10.44 |
| 197  | 1   | 83.07   | 82.72  | 78.54   | 78.75  | 50.75   | 90.58   | 89.46   | 53.66  | 71.64 |
| 197  | 2   | 83.62   | 83.21  | 78.68   | 79.14  | 50.75   | 90.34   | 89.78   | 53.66  | 71.33 |
| 197  | 3   | 79.63   | 81.69  | 76.21   | 71.93  | 45.73   | 90.01   | 88.55   | 51.22  | 68.19 |
| 197  | 4   | 80.81   | 82.50  | 76.47   | 72.90  | 45.73   | 89.96   | 88.90   | 51.22  | 68.29 |
| 197  | 5   | 75.49   | 80.92  | 75.86   | 76.41  | 47.24   | 89.22   | 88.01   | 53.66  | 66.85 |
| 198  | 1   | 31.21   | 50.19  | 61.17   | 53.61  | 29.14   | 41.23   | 29.80   | 51.22  | 35.13 |
| 198  | 2   | 69.62   | 79.51  | 77.78   | 65.69  | 41.71   | 88.53   | 88.32   | 56.10  | 63.98 |
| 198  | 3   | 63.88   | 77.42  | 76.24   | 57.70  | 33.67   | 87.17   | 85.36   | 53.66  | 62.20 |
| 198  | 4   | 69.94   | 79.54  | 79.84   | 61.21  | 47.24   | 89.90   | 88.00   | 56.10  | 65.32 |
| 198  | 5   | 68.42   | 77.69  | 77.90   | 62.77  | 42.21   | 88.88   | 87.70   | 56.10  | 64.54 |
| 199  | 1   | 69.33   | 69.60  | 45.11   | 38.79  | 1.00    | 77.99   | 85.60   | 7.32   | 48.80 |
| 207  | 1   | 58.78   | 33.16  | 52.54   | 22.42  | 12.06   | 68.80   | 65.13   | 12.20  | 41.31 |
| 207  | 2   | 58.71   | 65.68  | 56.72   | 22.81  | 9.04    | 78.10   | 74.67   | 7.32   | 48.33 |
| 214  | 1   | 47.82   | 57.07  | 54.60   | 0.58   | 0.50    | 69.66   | 83.86   | 2.44   | 35.25 |
| 214  | 2   | 54.17   | 64.91  | 59.19   | 22.42  | 1.00    | 73.05   | 85.54   | 9.76   | 35.75 |
| 214  | 3   | 54.10   | 61.82  | 59.19   | 22.42  | 1.00    | 71.62   | 84.61   | 9.76   | 35.40 |
| 214  | 4   | 60.90   | 68.47  | 60.41   | 44.64  | 1.00    | 74.30   | 86.16   | 9.76   | 42.65 |
| 214  | 5   | 60.83   | 65.85  | 60.41   | 44.64  | 1.00    | 73.26   | 85.54   | 9.76   | 42.39 |
| 217  | 1   | 46.86   | 71.29  | 52.37   | 59.45  | 15.58   | 72.33   | 72.77   | 41.46  | 45.79 |
| 217  | 2   | 53.63   | 71.51  | 56.69   | 69.78  | 16.58   | 74.25   | 73.08   | 48.78  | 49.91 |
| 217  | 3   | 46.86   | 71.29  | 53.33   | 59.45  | 15.58   | 72.33   | 72.77   | 41.46  | 45.79 |
| 217  | 4   | 53.63   | 71.51  | 57.39   | 69.78  | 16.58   | 74.25   | 73.08   | 48.78  | 49.91 |
| 217  | 5   | 48.14   | 67.23  | 49.87   | 54.58  | 12.56   | 70.08   | 66.09   | 41.46  | 41.64 |
| 219  | 1   | 60.63   | 63.61  | 49.11   | 44.44  | 2.51    | 79.83   | 75.55   | 29.27  | 51.92 |

Continued on next page

Additional file 3 – continued from previous page

| Team | Run | Abbrev. | Family | Formula | Ident. | Multip. | System. | Trivial | Undef. | Novel |
|------|-----|---------|--------|---------|--------|---------|---------|---------|--------|-------|
| 219  | 2   | 88.99   | 89.56  | 78.62   | 84.80  | 20.60   | 94.72   | 92.02   | 73.17  | 82.05 |
| 219  | 3   | 61.64   | 73.11  | 51.38   | 57.70  | 18.09   | 82.70   | 82.45   | 41.46  | 59.19 |
| 219  | 4   | 21.43   | 9.83   | 21.11   | 11.11  | 0.00    | 47.83   | 51.13   | 0.00   | 20.70 |
| 219  | 5   | 63.83   | 73.83  | 52.80   | 62.77  | 19.09   | 84.20   | 85.36   | 56.10  | 62.80 |
| 222  | 1   | 61.71   | 73.03  | 43.42   | 62.38  | 6.53    | 80.25   | 84.77   | 46.34  | 39.16 |
| 222  | 2   | 72.41   | 73.83  | 44.55   | 69.59  | 6.53    | 82.23   | 88.92   | 48.78  | 50.75 |
| 222  | 3   | 61.89   | 73.03  | 43.42   | 62.38  | 6.53    | 80.67   | 84.85   | 46.34  | 39.65 |
| 222  | 4   | 72.73   | 73.83  | 44.52   | 69.59  | 6.53    | 82.58   | 89.04   | 48.78  | 51.29 |
| 222  | 5   | 61.66   | 72.56  | 43.33   | 62.38  | 6.53    | 79.67   | 84.11   | 41.46  | 39.06 |
| 225  | 1   | 50.78   | 15.85  | 32.41   | 29.63  | 3.02    | 64.72   | 68.90   | 14.63  | 42.71 |
| 225  | 2   | 49.94   | 19.71  | 32.59   | 47.76  | 3.02    | 65.57   | 73.18   | 56.10  | 48.33 |
| 225  | 3   | 54.03   | 47.71  | 37.64   | 62.38  | 7.04    | 65.62   | 74.14   | 56.10  | 55.07 |
| 225  | 4   | 48.29   | 19.41  | 31.60   | 46.78  | 4.02    | 64.24   | 71.59   | 56.10  | 48.32 |
| 225  | 5   | 52.48   | 47.54  | 36.57   | 61.40  | 7.54    | 64.31   | 72.92   | 56.10  | 54.79 |
| 231  | 1   | 64.60   | 81.69  | 76.36   | 51.66  | 41.71   | 89.43   | 86.73   | 51.22  | 61.09 |
| 231  | 2   | 70.95   | 86.55  | 82.52   | 66.28  | 53.27   | 92.55   | 90.09   | 63.41  | 68.09 |
| 231  | 3   | 70.95   | 86.55  | 82.49   | 66.28  | 53.27   | 92.45   | 90.09   | 63.41  | 68.01 |
| 231  | 4   | 62.28   | 70.87  | 77.52   | 61.60  | 39.70   | 84.08   | 76.34   | 48.78  | 44.40 |
| 231  | 5   | 71.25   | 87.63  | 83.82   | 67.06  | 52.76   | 93.10   | 90.32   | 63.41  | 68.48 |
| 233  | 1   | 68.39   | 79.13  | 75.98   | 70.17  | 45.73   | 88.09   | 87.11   | 43.90  | 65.59 |
| 233  | 2   | 63.24   | 74.54  | 72.87   | 55.55  | 33.67   | 84.64   | 83.97   | 39.02  | 59.97 |
| 233  | 3   | 68.37   | 79.21  | 76.85   | 69.59  | 51.26   | 88.44   | 87.32   | 48.78  | 64.59 |
| 233  | 4   | 63.61   | 74.90  | 73.08   | 58.48  | 31.66   | 84.87   | 84.44   | 31.71  | 59.55 |
| 233  | 5   | 68.39   | 78.82  | 76.59   | 71.54  | 49.25   | 88.39   | 87.30   | 48.78  | 64.70 |
| 238  | 1   | 66.59   | 68.58  | 41.77   | 69.59  | 8.04    | 65.13   | 79.28   | 58.54  | 49.98 |
| 238  | 2   | 72.88   | 75.12  | 45.05   | 75.63  | 23.11   | 67.60   | 81.28   | 73.17  | 57.15 |
| 238  | 3   | 73.96   | 74.52  | 46.30   | 74.85  | 20.10   | 67.19   | 81.43   | 70.73  | 56.23 |
| 238  | 4   | 62.67   | 71.15  | 42.52   | 65.89  | 24.62   | 66.71   | 78.37   | 63.41  | 46.73 |
| 238  | 5   | 75.73   | 73.52  | 46.47   | 73.49  | 18.09   | 65.39   | 79.71   | 68.29  | 57.15 |
| 245  | 1   | 53.14   | 64.88  | 72.12   | 34.89  | 43.72   | 78.45   | 76.81   | 31.71  | 47.81 |
| 245  | 2   | 55.38   | 67.53  | 69.21   | 36.84  | 33.67   | 80.55   | 77.32   | 31.71  | 49.92 |
| 245  | 3   | 56.54   | 68.94  | 72.29   | 39.38  | 46.73   | 80.52   | 78.62   | 29.27  | 52.25 |
| 259  | 1   | 53.90   | 59.50  | 72.76   | 68.61  | 27.64   | 69.57   | 58.95   | 51.22  | 31.68 |
| 259  | 2   | 55.75   | 62.20  | 74.30   | 70.17  | 32.16   | 72.61   | 62.73   | 51.22  | 33.42 |
| 259  | 3   | 56.74   | 64.80  | 74.88   | 69.98  | 28.64   | 74.32   | 65.48   | 56.10  | 33.51 |
| 259  | 4   | 57.63   | 66.23  | 75.46   | 69.78  | 31.66   | 75.61   | 67.41   | 58.54  | 33.94 |
| 259  | 5   | 58.24   | 67.28  | 75.83   | 69.59  | 31.66   | 76.35   | 68.26   | 58.54  | 34.78 |
| 262  | 1   | 52.33   | 69.16  | 58.55   | 62.38  | 37.69   | 80.78   | 78.55   | 65.85  | 57.66 |
| 262  | 2   | 51.44   | 74.41  | 59.72   | 65.50  | 33.16   | 81.13   | 80.67   | 36.59  | 57.77 |
| 262  | 3   | 52.77   | 74.49  | 59.89   | 65.30  | 32.66   | 81.01   | 80.86   | 36.59  | 58.60 |
| 262  | 4   | 56.79   | 78.11  | 61.52   | 74.46  | 39.20   | 82.92   | 83.03   | 39.02  | 61.42 |
| 262  | 5   | 55.88   | 78.11  | 59.08   | 56.34  | 37.69   | 80.96   | 82.44   | 51.22  | 58.04 |
| 263  | 1   | 63.96   | 61.54  | 61.40   | 38.99  | 29.14   | 76.67   | 75.84   | 12.20  | 53.72 |
| 263  | 2   | 65.48   | 63.17  | 61.23   | 43.08  | 30.65   | 79.19   | 75.88   | 9.76   | 56.40 |
| 263  | 3   | 65.98   | 65.27  | 61.72   | 47.37  | 35.17   | 79.92   | 76.43   | 17.07  | 57.98 |
| 265  | 1   | 36.04   | 62.53  | 41.79   | 53.02  | 27.14   | 67.26   | 65.15   | 48.78  | 43.55 |
| 265  | 2   | 36.19   | 62.51  | 42.67   | 53.02  | 22.11   | 67.98   | 65.37   | 48.78  | 43.69 |
