# Supplementary material for: CHEMDNER: The drugs and chemical names extraction challenge
Source: PubMed Central journal article supplement (PMC4331685; doi:10.1186/1758-2946-7-s1-s1), 2015-01-19
Supplement: 1758-2946-7-S1-S1-S4.pdf [file 1758-2946-7-S1-S1-S4.pdf]

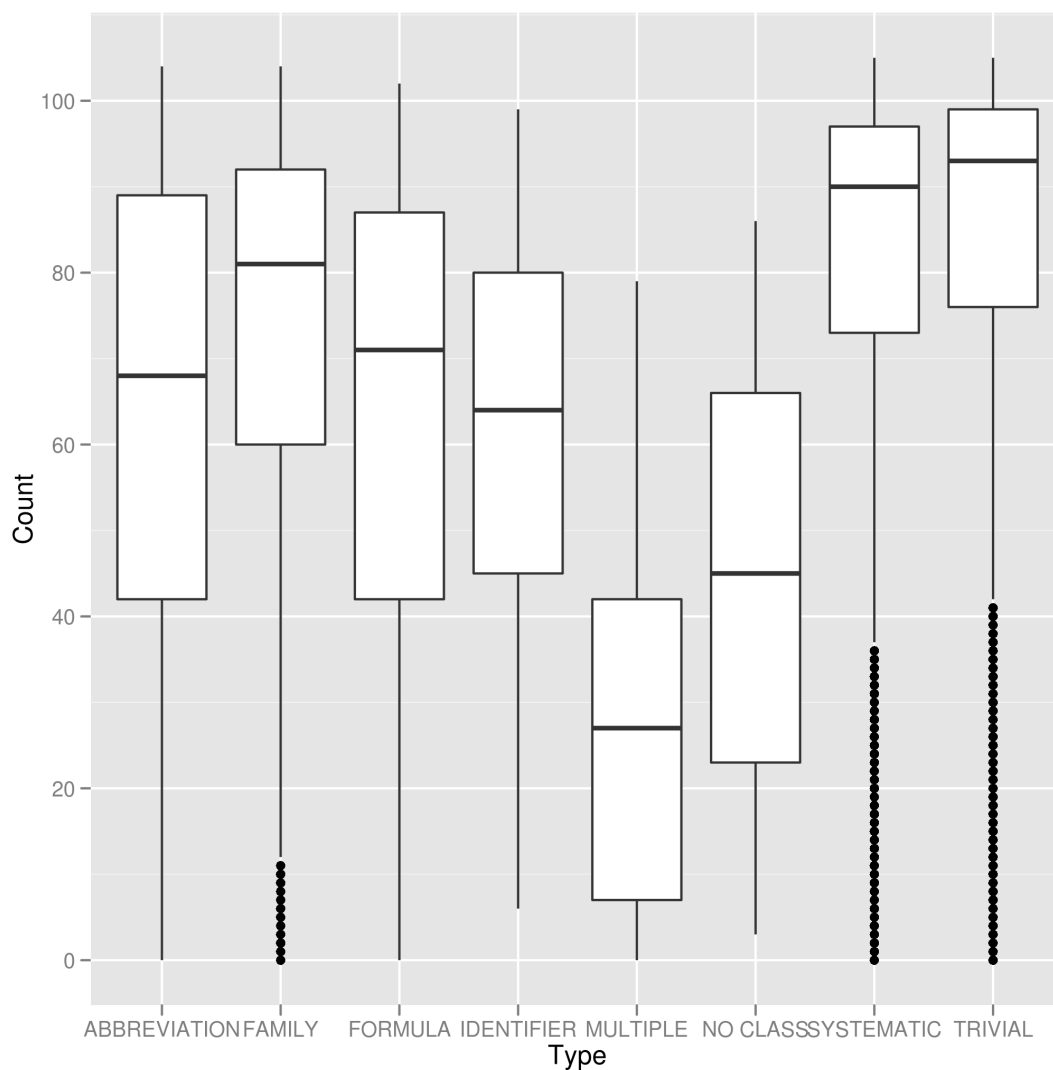

**Additional file 4.** Boxplot of the number of TP runs for each chemical mention per CEM class. Count: number of runs that correctly identified a mention, Type: CEM class. No class: 41 mentions that could not be assigned unambiguously to one of the CEM classes.
