# Supplementary material for: CHEMDNER: The drugs and chemical names extraction challenge
Source: PubMed Central journal article supplement (PMC4331685; doi:10.1186/1758-2946-7-s1-s1), 2015-01-19
Supplement: 1758-2946-7-S1-S1-S5.pdf [file 1758-2946-7-S1-S1-S5.pdf]

| CEM team rank            | 1 | 2 | 3 | 4 | 5 | 6 | 7 | 8 | 9 | 10 | 11 | 12 | 13 | 14 | 15 | 16 | 17 | 18 | 19 | 20 | 21 | 22 | 23 | 24 | 25 | 26 |
|--------------------------|---|---|---|---|---|---|---|---|---|----|----|----|----|----|----|----|----|----|----|----|----|----|----|----|----|----|
| <b>Lexical resources</b> |   |   |   |   |   |   |   |   |   |    |    |    |    |    |    |    |    |    |    |    |    |    |    |    |    |    |
| ChEBI                    |   |   | * | * | * | * | * |   |   |    | *  | *  |    | *  |    |    |    | *  | *  | *  |    |    |    |    |    | *  |
| PubChem                  |   | * | * | * | * |   |   |   |   |    | *  | *  |    | *  |    |    |    |    |    | *  | *  | *  |    |    |    |    |
| DrugBank                 |   |   |   | * |   |   | * |   |   | *  | *  | *  |    |    |    |    |    |    | *  |    | *  |    |    |    |    | *  |
| UMLS                     |   |   |   |   |   |   | * |   | * |    | *  |    |    |    |    |    |    |    | *  |    |    |    |    |    | *  | *  |
| CTD                      | * |   |   | * |   | * |   |   | * |    |    |    |    |    |    |    |    |    | *  |    |    |    |    |    |    |    |
| Jochem                   |   |   |   | * | * | * |   |   |   |    | *  |    |    |    |    |    |    |    |    |    |    |    |    |    |    |    |
| MeSH                     |   |   |   |   |   |   |   |   |   |    | *  |    |    |    |    |    |    |    | *  |    |    |    |    |    |    | *  |
| ChemSpider               |   |   |   |   |   |   |   |   |   |    | *  |    |    |    |    |    |    |    |    |    |    |    |    |    |    | *  |
| Wikipedia                |   |   | * |   |   |   |   |   |   |    | *  |    |    |    |    |    |    |    |    |    |    |    |    |    |    | *  |
| Other                    |   | * | * |   |   |   | * | * |   |    | *  | *  |    |    |    |    |    |    | *  |    |    |    | *  |    | *  | *  |
| <b>Lexicon expansion</b> | * |   | * |   | * |   |   |   |   |    | *  | *  |    |    |    | *  |    |    |    |    | *  |    |    |    | *  | *  |
| <b>Other chem. NER</b>   |   |   |   |   |   |   |   |   |   |    |    |    |    |    |    |    |    |    |    |    |    |    |    |    |    |    |
| Oscar4                   |   |   |   | * | * |   |   |   |   |    | *  |    |    |    | *  | *  | *  | *  | *  | *  |    |    |    |    |    | *  |
| ChemSpot                 | * |   |   | * |   |   |   |   |   |    |    |    |    |    | *  | *  | *  | *  | *  | *  | *  |    |    |    |    | *  |
| ChemAxon                 |   |   |   |   |   |   |   |   |   | *  | *  |    | *  |    |    |    |    |    |    |    |    |    |    |    |    |    |
| LeadMine                 |   |   | * |   |   |   |   |   |   |    | *  |    |    |    |    |    |    |    |    |    |    |    |    |    |    |    |
| MetaMap                  |   |   |   |   |   |   | * |   |   |    |    |    |    |    |    |    |    |    |    |    |    |    |    |    |    | *  |
| MiniChem Tagger          |   | * |   |   |   |   |   |   |   |    |    |    |    |    |    |    |    |    |    |    |    |    |    |    |    |    |
| Other                    |   |   |   |   |   |   |   |   |   | *  | *  |    |    |    |    |    |    |    |    | *  |    | *  |    | *  | *  | *  |
| <b>BioNLP tools</b>      |   |   |   |   |   |   |   |   |   |    |    |    |    |    |    |    |    |    |    |    |    |    |    |    |    |    |
| GeniaTagger              |   |   |   | * | * |   |   |   |   |    |    |    |    |    |    |    |    |    |    |    | *  |    |    |    |    |    |
| BANNER                   | * |   |   |   |   |   |   | * |   |    |    |    |    |    |    |    |    |    |    |    |    |    |    |    |    |    |
| Ab3P                     | * |   |   |   |   |   |   |   |   |    |    |    |    |    |    |    |    |    |    |    |    |    |    |    |    |    |
| Other                    |   |   |   |   | * | * |   |   |   |    |    |    |    |    |    |    |    |    | *  |    |    |    |    |    |    |    |
| <b>Software</b>          |   |   |   |   |   |   |   |   |   |    |    |    |    |    |    |    |    |    |    |    |    |    |    |    |    |    |
| Mallet                   | * |   |   | * | * | * | * |   |   |    |    |    |    |    |    |    | *  | *  |    | *  |    |    |    | *  |    | *  |
| OpenNLP                  |   |   |   | * |   |   |   |   |   | *  | *  | *  | *  |    |    |    |    | *  |    | *  |    | *  |    |    | *  | *  |
| CRF++                    | * | * |   |   |   |   |   |   |   |    |    | *  |    |    | *  | *  |    |    |    | *  | *  | *  |    |    |    |    |
| CRFsuite                 |   |   |   |   |   | * |   |   | * |    |    |    |    |    |    |    |    |    | *  |    |    |    |    |    |    |    |
| Stanford Tokenizer       |   |   |   |   |   |   |   |   | * |    |    |    |    |    |    |    |    |    |    |    |    |    | *  |    | *  | *  |
| Dragon Toolkit           | * |   |   |   |   |   | * |   |   |    |    |    |    |    |    |    |    |    |    |    |    |    |    |    |    |    |
| LingPipe                 |   |   |   | * |   |   |   |   |   |    |    |    |    |    |    |    |    |    |    |    |    | *  |    |    |    |    |
| Stanford Parser          |   |   |   | * |   |   |   |   |   |    |    |    |    |    |    |    |    |    |    |    |    |    |    |    | *  | *  |
| Weka                     |   |   |   |   |   |   |   |   | * |    |    |    |    |    |    |    |    |    |    | *  |    | *  |    |    |    |    |
| SVMLight                 |   |   |   |   |   |   |   |   |   |    |    |    |    |    |    |    |    |    | *  |    | *  |    |    |    |    |    |
| NERSuite                 |   |   |   | * |   |   |   |   |   |    |    |    |    |    |    |    |    |    | *  |    | *  |    |    |    |    |    |
| Other                    |   |   |   |   |   | * |   |   | * |    | *  |    |    | *  | *  | *  |    | *  |    |    |    |    | *  |    | *  | *  |

**Additional file 5.** Overview of resources used by participating teams.
