# Supplementary material for: CHEMDNER: The drugs and chemical names extraction challenge
Source: Springer Nature journal article supplement (doi:10.1186/1758-2946-7-s1-s1), 2015-01-19
Supplement: 13321_2015_620_MOESM2_ESM.pdf [file 13321_2015_620_MOESM2_ESM.pdf]

Additional file 2 : CEM evaluation results for all teams and runs

| Team | Run | Predictions | $P$    | $R$    | $F_1$  |
|------|-----|-------------|--------|--------|--------|
| 173  | 1   | 25722       | 85.950 | 87.208 | 86.574 |
| 173  | 2   | 24402       | 89.087 | 85.752 | 87.388 |
| 173  | 3   | 28500       | 81.916 | 92.091 | 86.706 |
| 173  | 4   | 26514       | 85.155 | 89.062 | 87.064 |
| 173  | 5   | 30438       | 76.720 | 92.115 | 83.715 |
| 177  | 1   | 28804       | 59.881 | 68.037 | 63.699 |
| 177  | 2   | 27634       | 62.235 | 67.840 | 64.916 |
| 179  | 1   | 23098       | 89.216 | 81.287 | 85.067 |
| 179  | 2   | 24301       | 88.733 | 85.058 | 86.857 |
| 179  | 3   | 22270       | 90.813 | 79.776 | 84.937 |
| 179  | 4   | 23512       | 90.094 | 83.559 | 86.704 |
| 179  | 5   | 24118       | 88.689 | 84.375 | 86.478 |
| 182  | 1   | 24885       | 61.459 | 60.329 | 60.889 |
| 182  | 2   | 104925      | 19.708 | 81.571 | 31.746 |
| 182  | 3   | 9984        | 92.708 | 36.511 | 52.390 |
| 182  | 4   | 4627        | 98.055 | 17.897 | 30.269 |
| 184  | 1   | 22490       | 92.036 | 81.650 | 86.532 |
| 184  | 2   | 22378       | 92.023 | 81.232 | 86.291 |
| 184  | 3   | 22222       | 92.674 | 81.235 | 86.579 |
| 184  | 4   | 22109       | 92.664 | 80.813 | 86.334 |
| 184  | 5   | 23053       | 90.622 | 82.407 | 86.319 |
| 185  | 1   | 24097       | 84.218 | 80.052 | 82.082 |
| 185  | 2   | 24087       | 84.249 | 80.048 | 82.095 |
| 185  | 3   | 24051       | 84.454 | 80.123 | 82.231 |
| 191  | 1   | 18427       | 75.715 | 55.035 | 63.740 |
| 192  | 1   | 22924       | 89.138 | 80.604 | 84.657 |
| 192  | 2   | 22860       | 88.968 | 80.226 | 84.371 |
| 192  | 3   | 23021       | 89.279 | 81.074 | 84.979 |
| 192  | 4   | 22988       | 89.416 | 81.082 | 85.045 |
| 192  | 5   | 23503       | 88.304 | 81.867 | 84.963 |
| 196  | 1   | 0           | 0.000  | 0.000  | 0.000  |
| 196  | 2   | 1864        | 96.727 | 07.112 | 13.250 |
| 196  | 3   | 30886       | 63.922 | 77.879 | 70.214 |
| 196  | 4   | 6183        | 92.916 | 22.662 | 36.437 |
| 196  | 5   | 7952        | 79.779 | 25.025 | 38.099 |

Continued on next page

Additional file 2 – continued from previous page

| Team | Run | Predictions | <i>P</i> | <i>R</i> | <i>F</i> <sub>1</sub> |
|------|-----|-------------|----------|----------|-----------------------|
| 197  | 1   | 25104       | 86.504   | 85.661   | 86.081                |
| 197  | 2   | 25694       | 84.747   | 85.894   | 85.317                |
| 197  | 3   | 24446       | 87.172   | 84.060   | 85.587                |
| 197  | 4   | 25102       | 85.352   | 84.513   | 84.931                |
| 197  | 5   | 24046       | 87.507   | 83.003   | 85.195                |
| 198  | 1   | 11696       | 87.278   | 40.267   | 55.108                |
| 198  | 2   | 22898       | 90.571   | 81.807   | 85.967                |
| 198  | 3   | 22201       | 90.136   | 78.936   | 84.165                |
| 198  | 4   | 22908       | 91.082   | 82.304   | 86.471                |
| 198  | 5   | 22630       | 90.968   | 81.204   | 85.809                |
| 199  | 1   | 21356       | 85.199   | 71.772   | 77.911                |
| 207  | 1   | 18121       | 80.145   | 57.288   | 66.815                |
| 207  | 2   | 20216       | 84.626   | 67.485   | 75.089                |
| 214  | 1   | 18819       | 87.082   | 64.644   | 74.204                |
| 214  | 2   | 20068       | 87.338   | 69.137   | 77.179                |
| 214  | 3   | 19334       | 89.262   | 68.076   | 77.243                |
| 214  | 4   | 22424       | 81.181   | 71.808   | 76.207                |
| 214  | 5   | 21711       | 82.903   | 70.999   | 76.491                |
| 217  | 1   | 22073       | 74.390   | 64.771   | 69.248                |
| 217  | 2   | 23291       | 73.174   | 67.228   | 70.075                |
| 217  | 3   | 22536       | 73.008   | 64.901   | 68.716                |
| 217  | 4   | 23751       | 71.858   | 67.323   | 69.517                |
| 217  | 5   | 22393       | 69.482   | 61.374   | 65.177                |
| 219  | 1   | 21281       | 80.461   | 67.544   | 73.439                |
| 219  | 2   | 71497       | 31.639   | 89.231   | 46.714                |
| 219  | 3   | 25536       | 72.024   | 72.549   | 72.286                |
| 219  | 4   | 9411        | 92.573   | 34.366   | 50.124                |
| 219  | 5   | 27506       | 68.720   | 74.561   | 71.521                |
| 222  | 1   | 22021       | 82.480   | 71.646   | 76.682                |
| 222  | 2   | 28592       | 66.938   | 75.496   | 70.960                |
| 222  | 3   | 22208       | 81.952   | 71.792   | 76.537                |
| 222  | 4   | 29010       | 66.115   | 75.658   | 70.565                |
| 222  | 5   | 21034       | 85.832   | 71.216   | 77.844                |
| 225  | 1   | 19662       | 65.924   | 51.130   | 57.592                |
| 225  | 2   | 21715       | 62.473   | 53.513   | 57.647                |
| 225  | 3   | 35974       | 41.922   | 59.489   | 49.184                |
| 225  | 4   | 22141       | 59.853   | 52.274   | 55.807                |
| 225  | 5   | 34563       | 42.826   | 58.388   | 49.411                |
| 231  | 1   | 22426       | 91.046   | 80.541   | 85.472                |
| 231  | 2   | 24497       | 88.199   | 85.227   | 86.688                |
| 231  | 3   | 24240       | 89.105   | 85.200   | 87.109                |
| 231  | 4   | 20900       | 90.450   | 74.569   | 81.745                |
| 231  | 5   | 24993       | 87.040   | 85.811   | 86.421                |
| 233  | 1   | 23486       | 87.371   | 80.944   | 84.035                |
| 233  | 2   | 22623       | 86.178   | 76.904   | 81.277                |
| 233  | 3   | 23284       | 88.464   | 81.251   | 84.704                |
| 233  | 4   | 22751       | 86.102   | 77.271   | 81.448                |
| 233  | 5   | 23206       | 88.671   | 81.168   | 84.754                |
| 238  | 1   | 28179       | 59.981   | 66.672   | 63.150                |
| 238  | 2   | 31725       | 56.328   | 70.490   | 62.618                |
| 238  | 3   | 35338       | 50.690   | 70.660   | 59.032                |
| 238  | 4   | 21972       | 76.902   | 66.652   | 71.411                |
| 238  | 5   | 45455       | 38.955   | 69.847   | 50.016                |
| 245  | 1   | 20438       | 86.657   | 69.863   | 77.359                |
| 245  | 2   | 21109       | 85.021   | 70.794   | 77.258                |
| 245  | 3   | 21562       | 84.821   | 72.143   | 77.970                |
| 259  | 1   | 17655       | 89.612   | 62.408   | 73.576                |
| 259  | 2   | 18538       | 89.174   | 65.208   | 75.331                |
| 259  | 3   | 19000       | 89.426   | 67.023   | 76.621                |
| 259  | 4   | 19457       | 89.058   | 68.352   | 77.343                |
| 259  | 5   | 19723       | 88.790   | 69.078   | 77.703                |
| 262  | 1   | 22900       | 77.629   | 70.123   | 73.686                |
| 262  | 2   | 22976       | 79.004   | 71.603   | 75.122                |
| 262  | 3   | 23565       | 77.322   | 71.875   | 74.499                |
| 262  | 4   | 24157       | 78.275   | 74.589   | 76.388                |
| 262  | 5   | 24347       | 76.149   | 73.133   | 74.611                |
| 263  | 1   | 20870       | 83.699   | 68.905   | 75.585                |
| 263  | 2   | 21425       | 82.856   | 70.025   | 75.902                |
| 263  | 3   | 21894       | 82.137   | 70.936   | 76.127                |

Continued on next page

Additional file 2 – continued from previous page

| Team | Run | Predictions | $P$    | $R$    | $F_1$  |
|------|-----|-------------|--------|--------|--------|
| 265  | 1   | 16653       | 86.537 | 56.846 | 68.617 |
| 265  | 2   | 16786       | 86.346 | 57.173 | 68.795 |
